# Supplementary material for: Identification of Deoxynivalenol and Degradation Products during Maize Germ Oil Refining Process
Source: MDPI journal article supplement (doi:10.3390/foods11121720), 2022-06-13
Supplement: s1 [file s1]

# **Identification Deoxynivalenol and Degradation Products during Maize Germ Oil Refining Process**

Yuqian Guo <sup>1</sup>, Tianying Lu <sup>1</sup>, Jiacheng Shi <sup>2</sup>, Xiaoyang Li <sup>3,\*</sup>, Kesheng Wu <sup>4</sup>  
and Yonghua Xiong <sup>1,3,\*</sup>

1 State Key Laboratory of Food Science and Technology,

Nanchang University, Nanchang 330047, China;

2 Beijing Center for Disease Prevention and Control, Beijing 100013, China;

3 School of Food Science and Technology, Nanchang University,

Nanchang 330047, China;

4 Jiangxi Institute of Veterinary Drug and Feedstuff Control,

Nanchang 330096, China;

\* Correspondence to:

Dr. Xiaoyang Li

School of Food Science and Technology, Nanchang University,

Nanchang 330047, China

E-mail: xyli@ncu.edu.cn;

Dr. Yonghua Xiong

State Key Laboratory of Food Science and Technology, Nanchang University,

Nanchang 330047, P.R. China

E-mail: yhxiongchen@163.com;

**Table S1:** The MS/MS data of DON and <sup>13</sup>C-DON.

| Compound name       | Precursor ions | Qualitative ion | Quantitative ion |
|---------------------|----------------|-----------------|------------------|
|                     | (m/z)          | (m/z)           | (m/z)            |
| DON                 | 295            | 138             | 265              |
| <sup>13</sup> C-DON | 310            | 145             | 279              |

**Table S2:** The transfer rules of DON during the refining process. The conservation of matter is calculated according to each component produced in the corn germ oil processing shown in Figure 2.

| Sample | Name                 | Concentration of DON (ng/g) | Weight<br>(g) | Total quality of DON<br>(ng) | Percentage<br>(%) |
|--------|----------------------|-----------------------------|---------------|------------------------------|-------------------|
| S1     | Crude oil            | 998.3                       | 50.0          | 49918.7                      | 100.00            |
| S5     | Colloidal impurities | 1562.5                      | 16.0          | 24999.3                      | 50.1              |
| -      | Total difference     | /                           | /             | 7617.3                       | 15.2              |
| S2     | Degummed oil         | 346.0                       | 50.0          | 17302.1                      | 34.7              |
| S6     | Saponin              | 627.6                       | 8.0           | 5020.7                       | 10.1              |
| S7     | Wash Water           | 61.0                        | 8.0           | 488.0                        | 1.0               |
| -      | Total difference     | /                           | /             | 10877.6                      | 21.8              |
| S3     | Deacidified oil      | 18.3                        | 50.0          | 916.0                        | 1.8               |
| S8     | Clay                 | 86.0                        | 8.0           | 688.0                        | 1.4               |
| -      | Total difference     | /                           | /             | 288.0                        | 0.4               |
| S4     | Decoloration oil     | 0.0                         | 50.0          | 0.0                          | 0.0               |

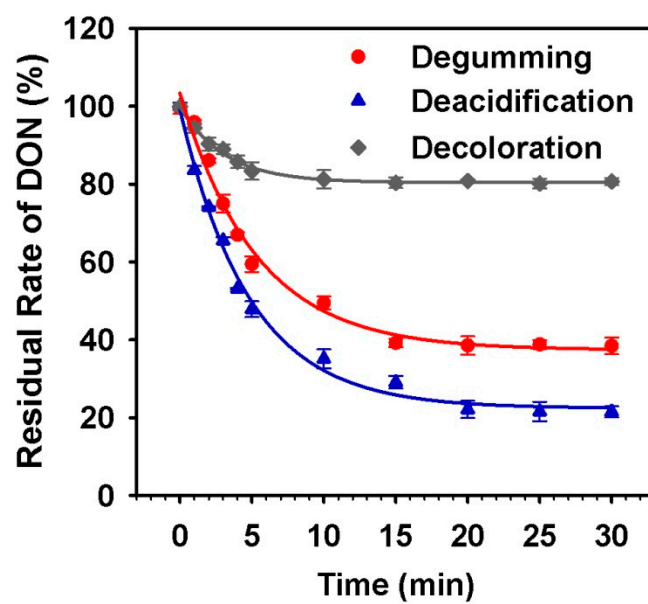

**Figure S1.** The variety of residual rate of DON in different refining processing from 0 to 30 minute.

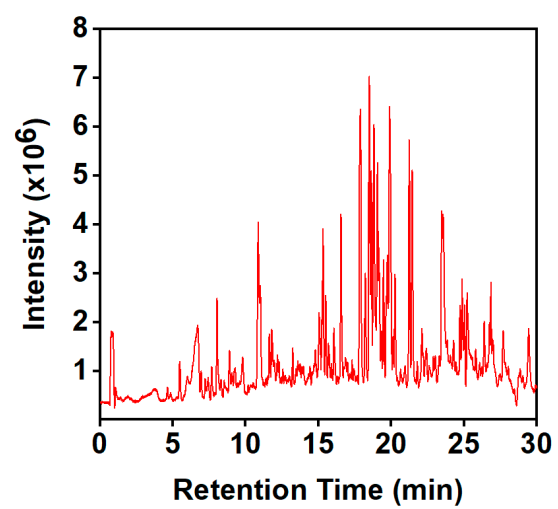

**Figure S2.** Total-ion chromatogram of germ oil extraction.

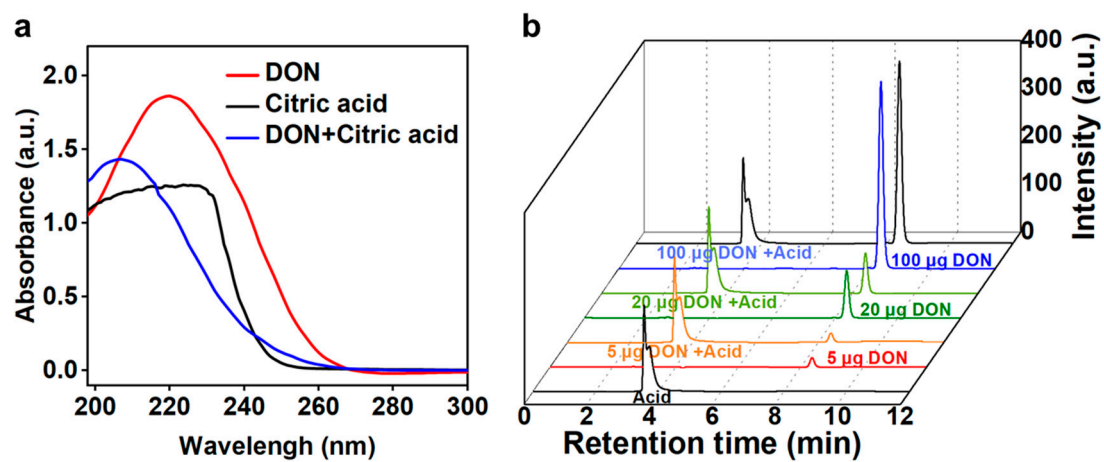

**Figure S3** Characterizations of the DON variations in simulated degumming process in aqueous solution. (a) UV-vis absorption spectra of the DON or the solution of acid treatment. (b) HPLC chromatogram spectra of the different amounts DON and the solutions after acid treatment.

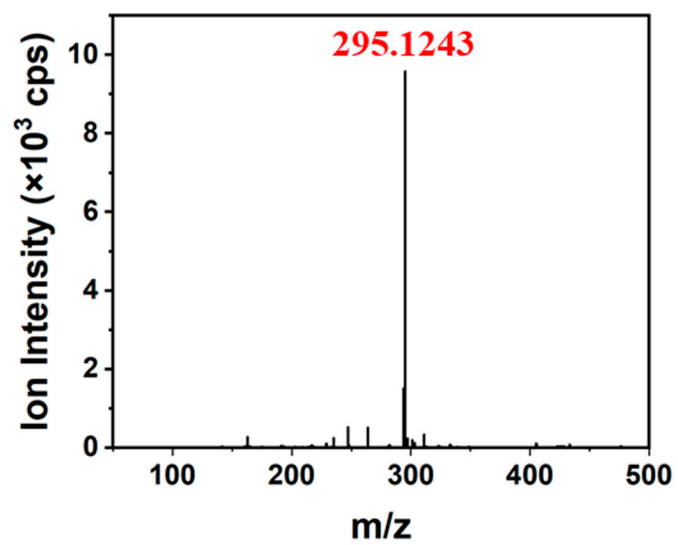

**Figure S4** TOF-MS spectra of DON.

**Table S3:** Assignments of signals for  $^1\text{H}$  NMR,  $^{13}\text{C}$  NMR,  $^1\text{H}$ – $^{13}\text{C}$  HSQC and  $^1\text{H}$ – $^1\text{H}$  COSY of norDON B.

| Carbon atom | $\delta_{\text{C}}$ | $\delta_{\text{H}}$ | $^1\text{H}$ – $^1\text{H}$ COSY | $^1\text{H}$ – $^{13}\text{C}$ HSQC |
|-------------|---------------------|---------------------|----------------------------------|-------------------------------------|
| 1           | 35.00               | <i>ND</i>           | <i>ND</i>                        | <i>ND</i>                           |
| 2           | 66.92               | 3.80                | H-3                              | +                                   |
| 3           | 72.45               | 4.55                | H-2, H-4                         | +                                   |
| 4           | 14.84               | 2.13                | H-3                              | +                                   |
| 5           | 55.33               | <i>ND</i>           | <i>ND</i>                        | <i>ND</i>                           |
| 6           | 121.15              | <i>ND</i>           | <i>ND</i>                        | <i>ND</i>                           |
| 7           | 123.04              | 6.79                | H-8                              | +                                   |
| 8           | 114.33              | 6.67                | H-7                              | +                                   |
| 9           | 118.09              | <i>ND</i>           | <i>ND</i>                        | <i>ND</i>                           |
| 10          | 122.51              | 4.70 (10-OH)        | <i>ND</i>                        | <i>ND</i>                           |
| 11          | 114.33              | <i>ND</i>           | <i>ND</i>                        | <i>ND</i>                           |
| 12          | 45.49               | 2.00                | <i>ND</i>                        | +                                   |
| 13          | 21.58               | 1.39                | <i>ND</i>                        | +                                   |
| 14          | 12.85               | 1.37                | <i>ND</i>                        | +                                   |
| 2-OH        | <i>ND</i>           | 2.71                | H-2                              | <i>ND</i>                           |
| 3-OH        | <i>ND</i>           | 2.67                | H-3                              | <i>ND</i>                           |
| 12-OH       | <i>ND</i>           | 2.55                | <i>ND</i>                        | <i>ND</i>                           |

Chemical structure of  
norDON B

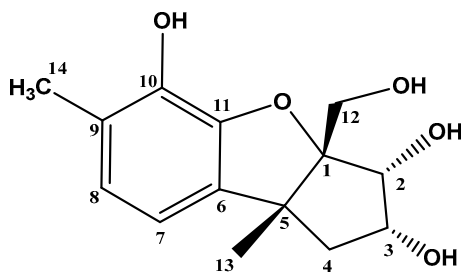



nordon-b-ncu

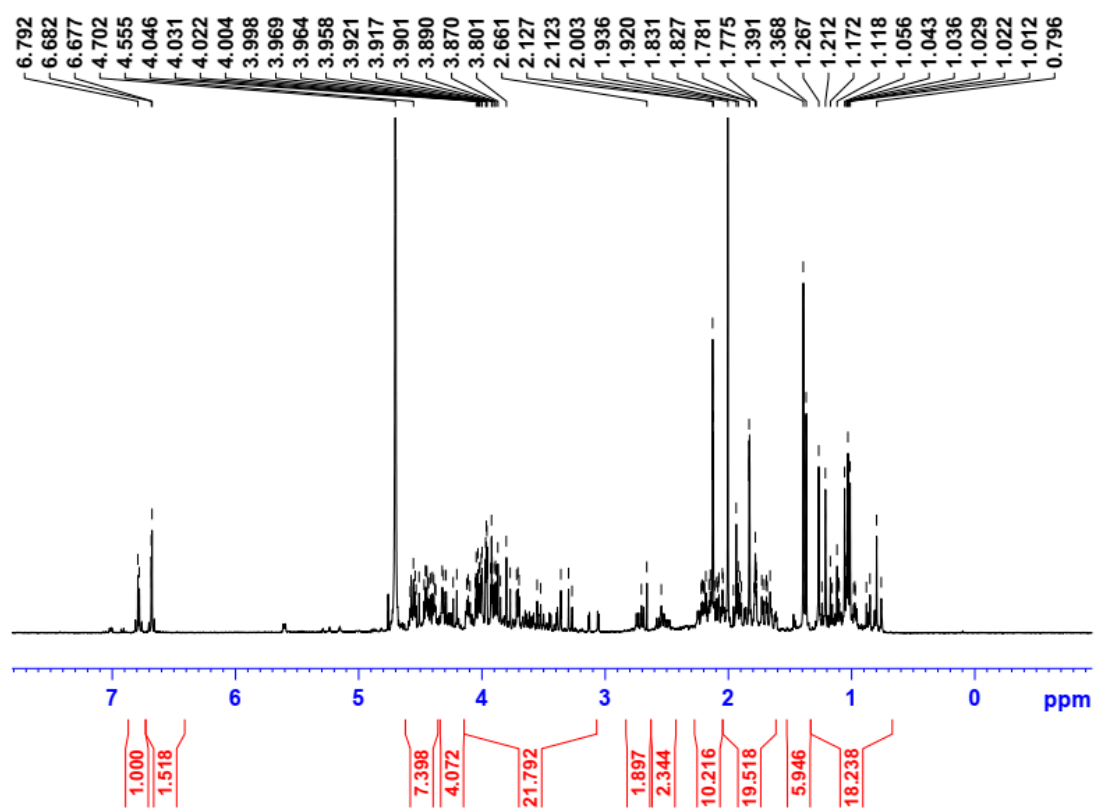

Figure S5.  $^1\text{H}$  NMR spectrum of norDON B.

nordon-b-ncu

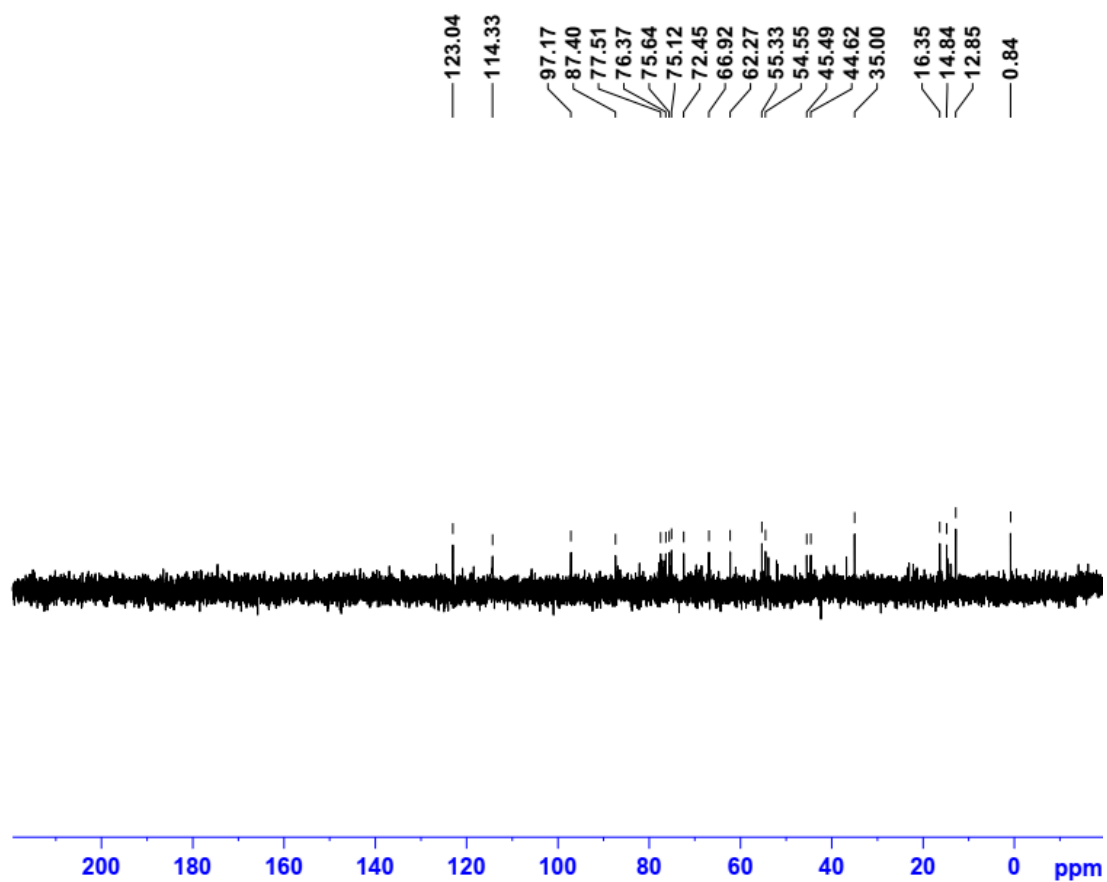

**Figure S6.**  $^{13}\text{C}$  NMR spectrum of norDON B.

nordon-b-ncu

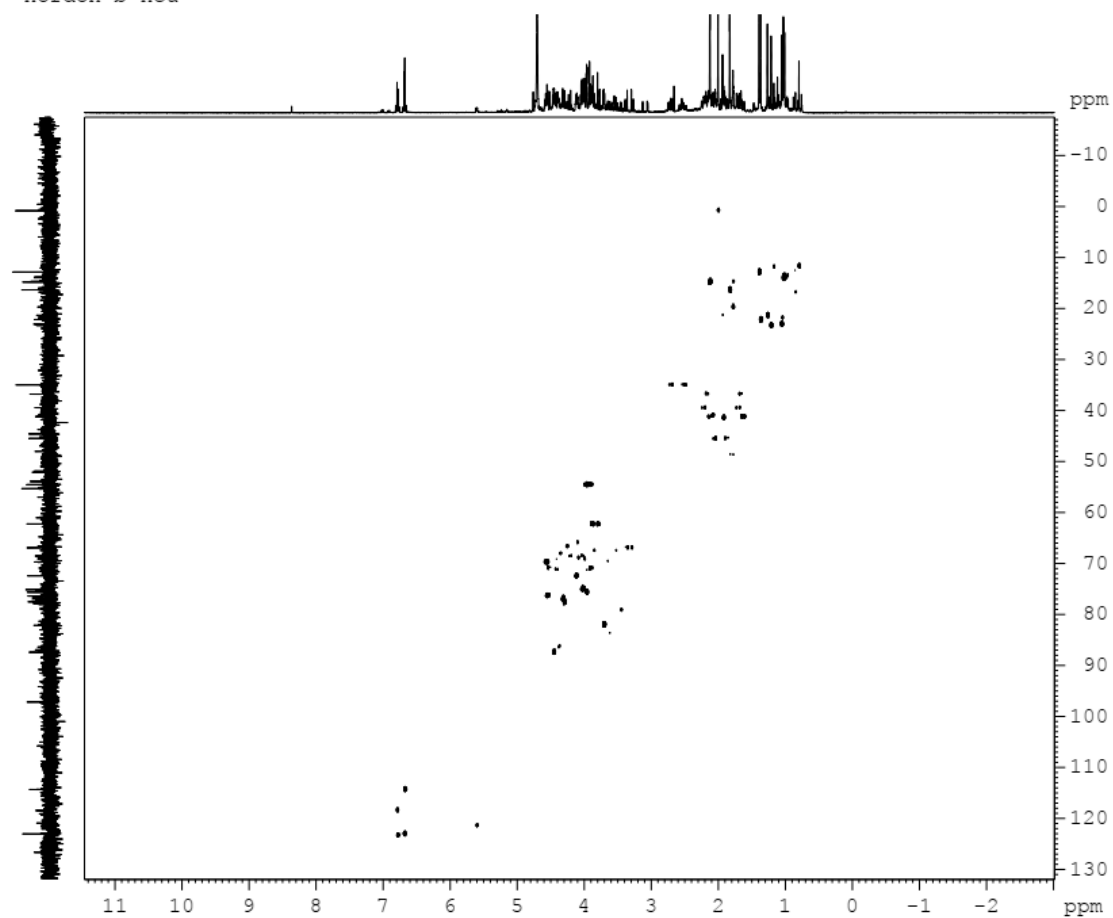

**Figure S7.**  $^1\text{H}$ - $^{13}\text{C}$  HSQC spectrum of norDON B.

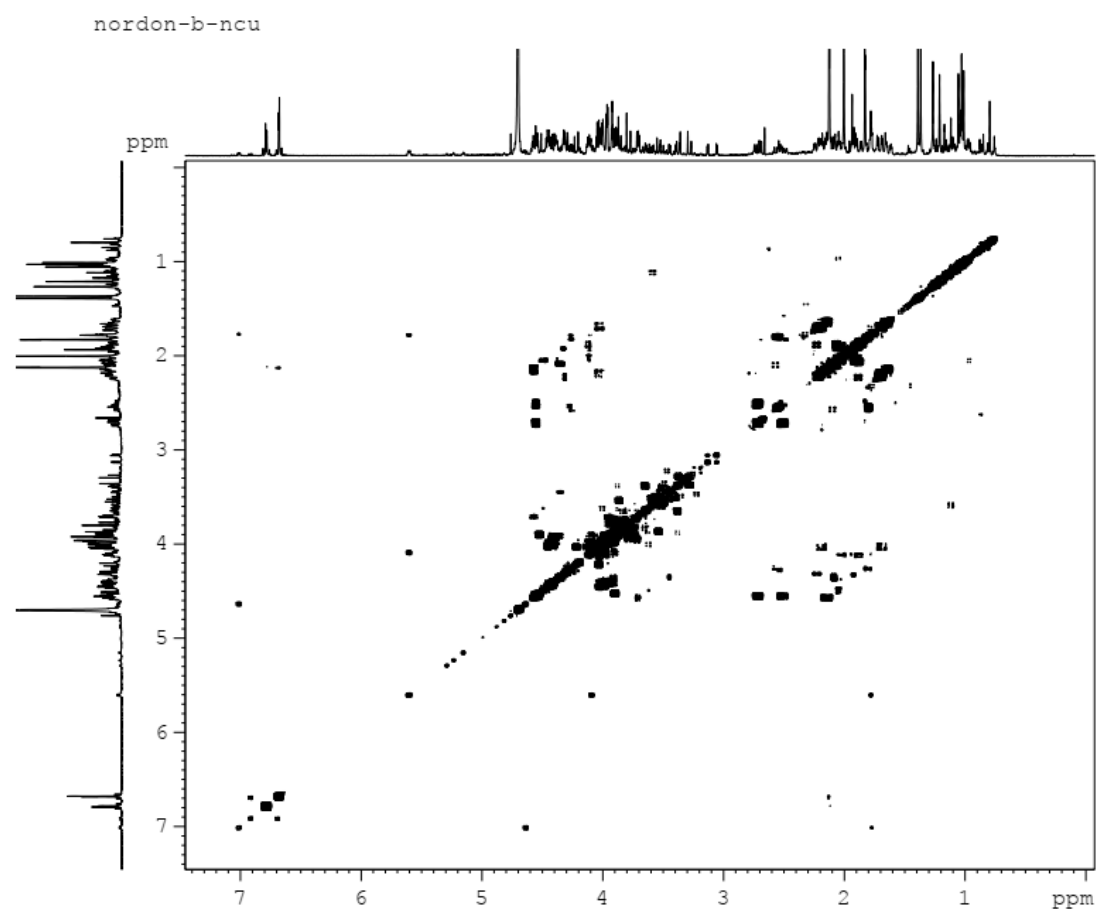

**Figure S8.**  $^1\text{H}$ - $^1\text{H}$  COSY spectrum of norDON B.

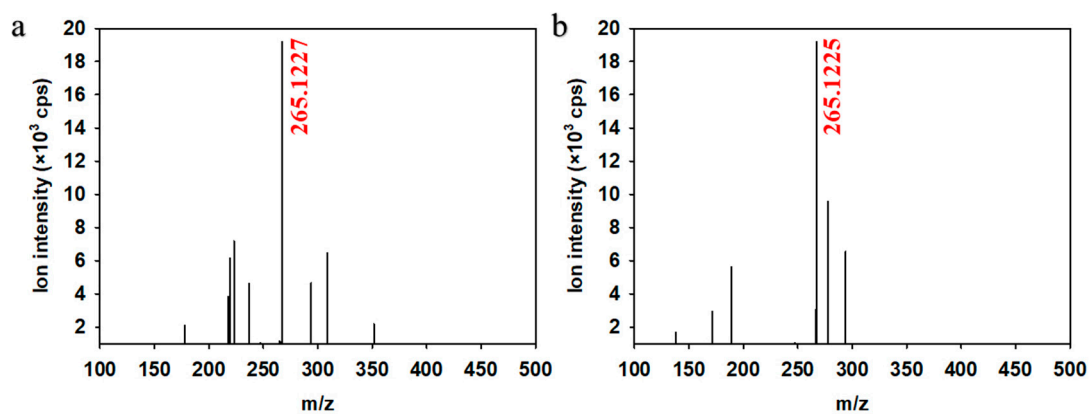

**Figure S9.** TOF-MS spectra of norDON B detected in saponin (a) and washing water (b).

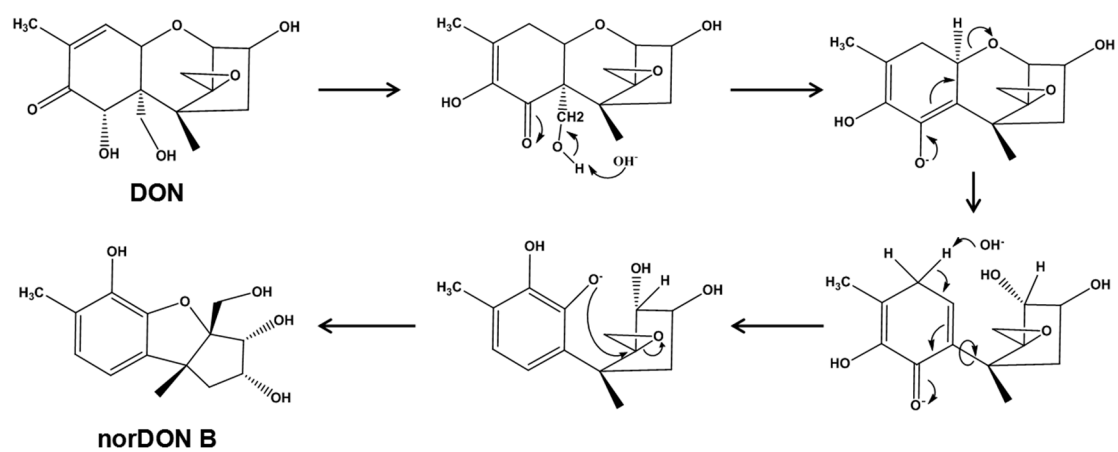

**Figure S10.** Potential conversion mechanism of DON during alkali neutralization refining process.
